# Supplementary material for: Synthesis and structure-dependent optical properties of two new organic–inorganic hybrid antimony(iii) chlorides
Source: Royal Society of Chemistry journal article supplement (doi:10.1039/d3dt02867d), 2023-11-24
Supplement: d3dt02867d1.pdf [file d3dt02867d1.pdf]

**Synthesis and structure-dependent optical properties of two new  
organic-inorganic hybrid antimony(III) chlorides**

Xuemei Wen,<sup>a</sup> Juan Cheng,<sup>a</sup> Peiqi Qian,<sup>a</sup> Zhizhuan Zhang,<sup>a</sup> Hongmei Zeng,<sup>\*a</sup> Ling  
Huang,<sup>b</sup> Guohong Zou<sup>a</sup> and Zhien Lin<sup>\*a</sup>

<sup>a</sup> *College of Chemistry, Sichuan University, Chengdu 610064, P. R. China.*

<sup>b</sup> *College of Chemistry and Materials Science, Sichuan Normal University, Chengdu  
610068, China.*

\* To whom correspondence should be addressed. Tel: +86-28-85412284. E-mail:  
zenghongmei@scu.edu.cn, zhienlin@scu.edu.cn.

Table S1. Hydrogen bonds for compound **1**

| D-H...A <sup>a</sup> | d(D-H) (Å) | d(H...A) (Å) | d(D...A) (Å) | <(DHA) (deg) |
|----------------------|------------|--------------|--------------|--------------|
| N1-H1...C114         | 1.00       | 2.23         | 3.106(5)     | 145.5        |
| N2-H2...C15#1        | 1.00       | 2.16         | 3.132(5)     | 163.7        |
| N3-H3...C15          | 1.00       | 2.33         | 3.175(5)     | 141.9        |
| N4-H4...C14#2        | 1.00       | 2.20         | 3.096(5)     | 148.1        |
| N5-H5...C14#3        | 1.00       | 2.33         | 3.157(5)     | 139.5        |
| N6-H6...C13#4        | 1.00       | 2.50         | 3.325(5)     | 139.6        |
| N6-H6...C15#4        | 1.00       | 2.43         | 3.174(5)     | 130.5        |

<sup>a</sup>Symmetry transformations used to generate equivalent atoms: #1 1-X, 1-Y, 1-Z; #2 +X, -1+Y, +Z; #3 1-X, 1-Y, 2-Z; #4 1+X, +Y, +Z.

Table S2. Hydrogen bonds for compound **2**

| D-H...A     | d(D-H) (Å) | d(H...A) (Å) | d(D...A) (Å) | <(DHA) (deg) |
|-------------|------------|--------------|--------------|--------------|
| N1-H1...C16 | 0.98       | 2.37         | 3.165(6)     | 138.0        |
| N2-H2...C15 | 0.98       | 2.10         | 3.023(5)     | 155.9        |
| N3-H3...C16 | 0.98       | 2.59         | 3.292(6)     | 128.3        |

Table S3. Torsion angles for the organic cations in compounds **1** and **2**

|                   |             | A-B-C-D        | the torsion angle | conformation |
|-------------------|-------------|----------------|-------------------|--------------|
| compound <b>1</b> | Type I      | N1-C3-C4-N2    | 176.2(4)°         | <i>TTTT</i>  |
|                   |             | C3-C4-N2-C6    | 177.5(5)°         |              |
|                   |             | C4-N2-C6-C7    | 171.1(5)°         |              |
|                   |             | N2-C6-C7-N3    | 178.1(4)°         |              |
|                   | Type II     | N4-C12-C13-N5  | 179.3(4)°         | <i>TTGT</i>  |
|                   |             | C12-C13-N5-C15 | 162.6(5)°         |              |
|                   |             | C13-N5-C15-C16 | 55.2(7)°          |              |
|                   |             | N5-C15-C16-N6  | 168.8(4)°         |              |
| compound <b>2</b> | N1-C3-C4-N2 | 149.9(5)°      | <i>TTGG</i>       |              |
|                   | C3-C4-N2-C6 | 160.3(5)°      |                   |              |
|                   | C4-N2-C6-C7 | 66.1(7)°       |                   |              |
|                   | N2-C6-C7-N3 | 70.0(8)°       |                   |              |

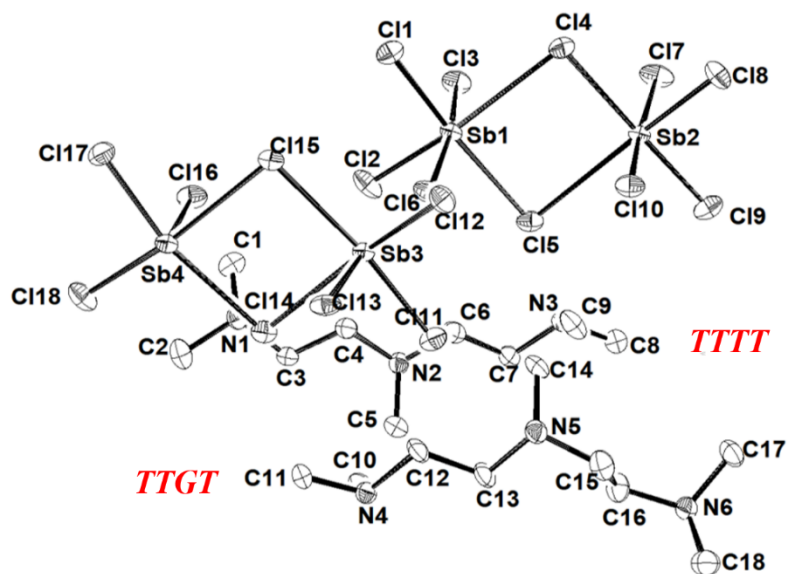

**Fig. S1** ORTEP plot of the asymmetric unit of compound **1**, showing the labeling scheme and the 50% probability displacement ellipsoids.

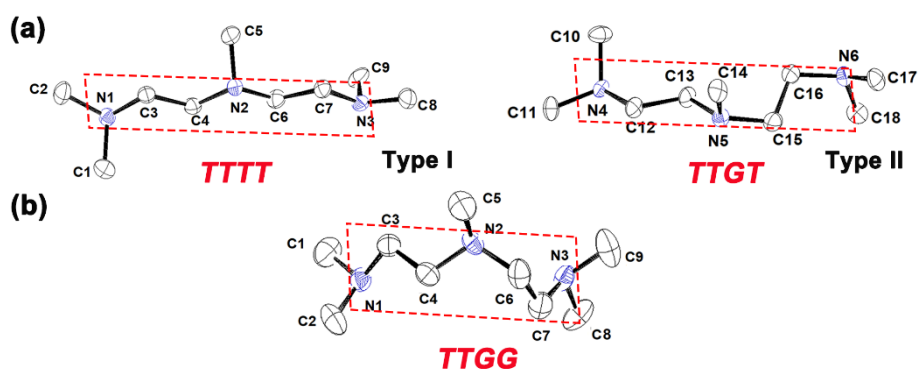

**Fig. S2** (a) The *TTTT* conformation of type I organic cation and the *TTGT* conformation of type II organic cation in compound **1**; (b) The *TTGG* conformation of the organic cation in compound **2**.

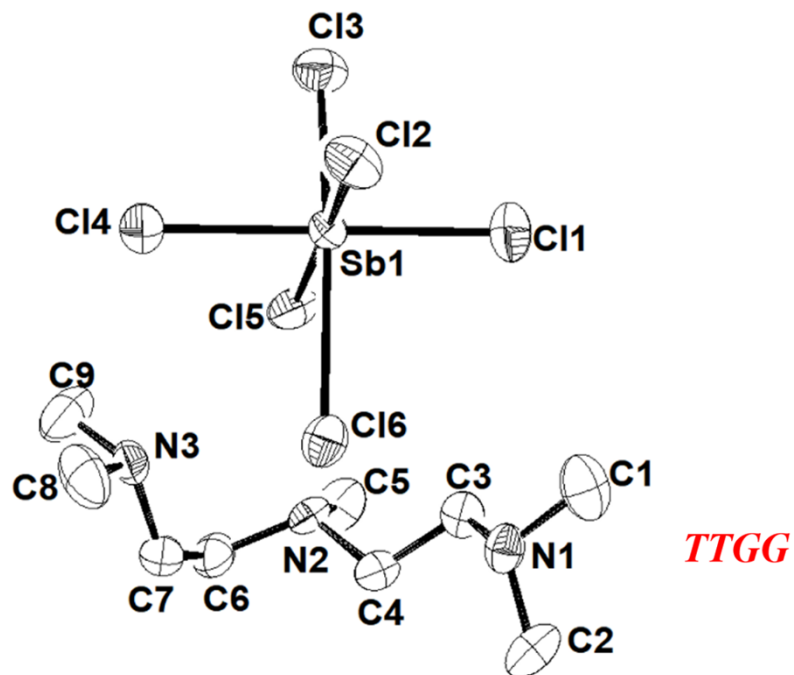

**Fig. S3** ORTEP plot of the asymmetric unit of compound **2**, showing the labeling scheme and the 50% probability displacement ellipsoids.

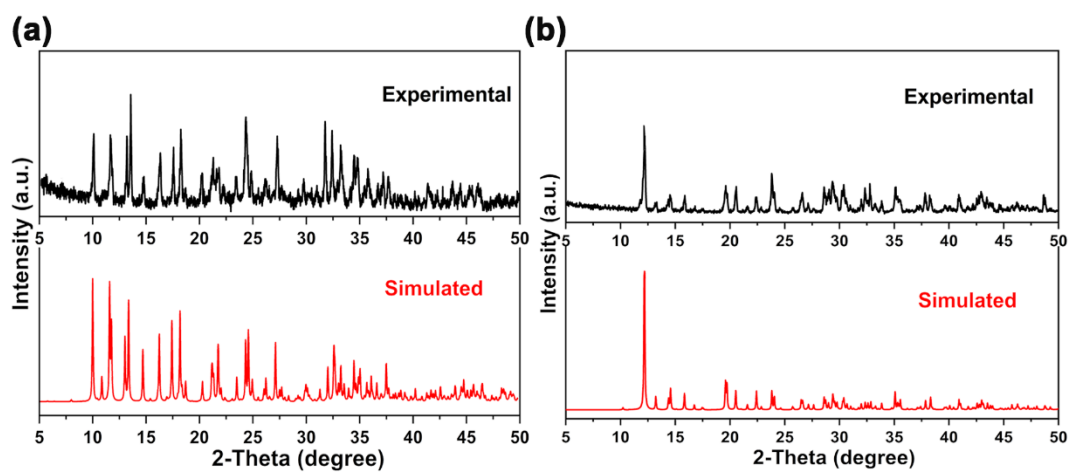

**Fig. S4** Experimental and simulated XRD patterns for compound **1** (a) and compound **2** (b).

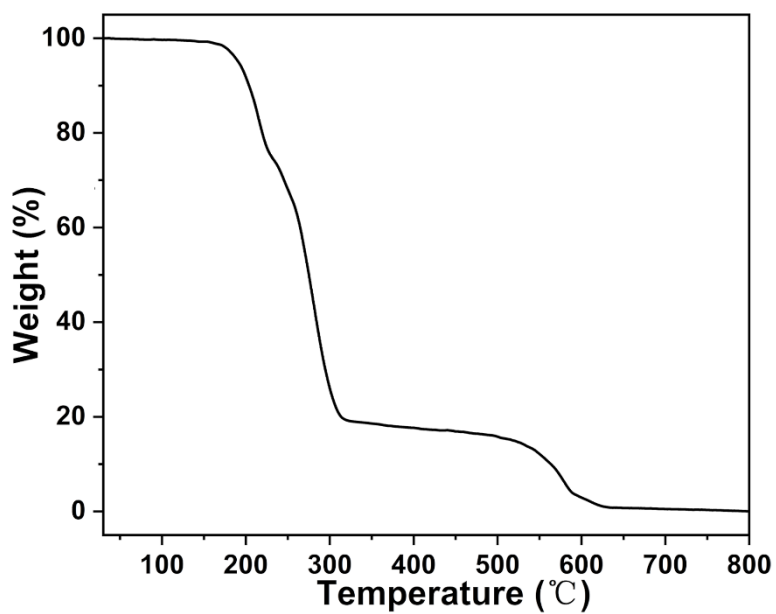

**Fig. S5** TGA analysis of compound **1** under N<sub>2</sub> atmosphere.

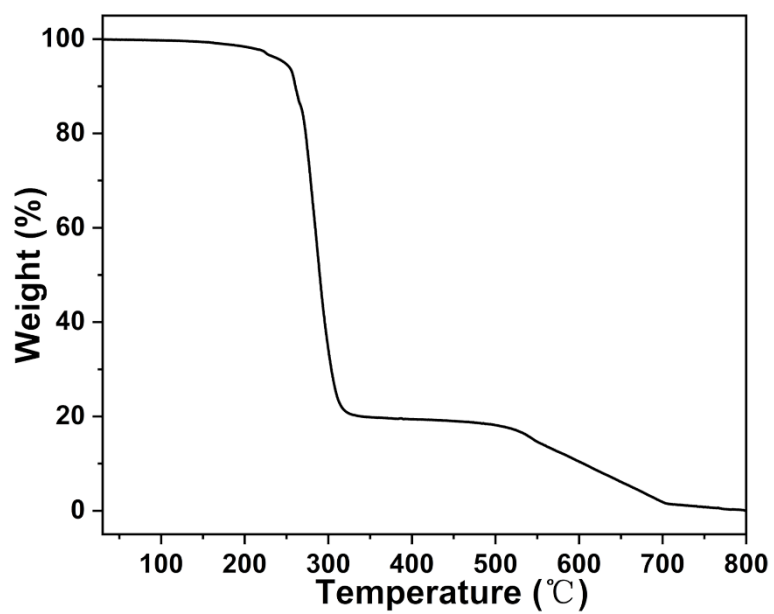

**Fig. S6** TGA analysis of compound **2** under N<sub>2</sub> atmosphere.

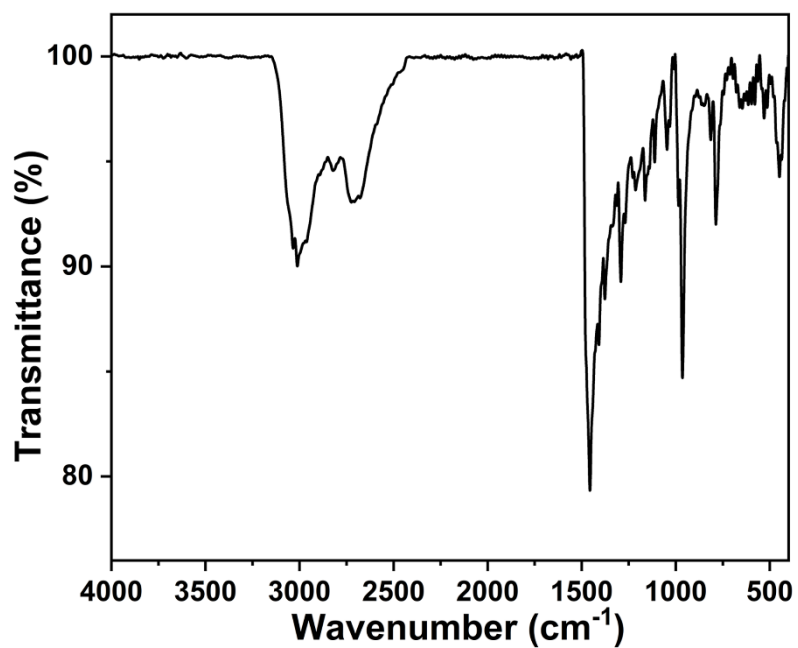

Fig. S7 The IR spectrum of compound 1.

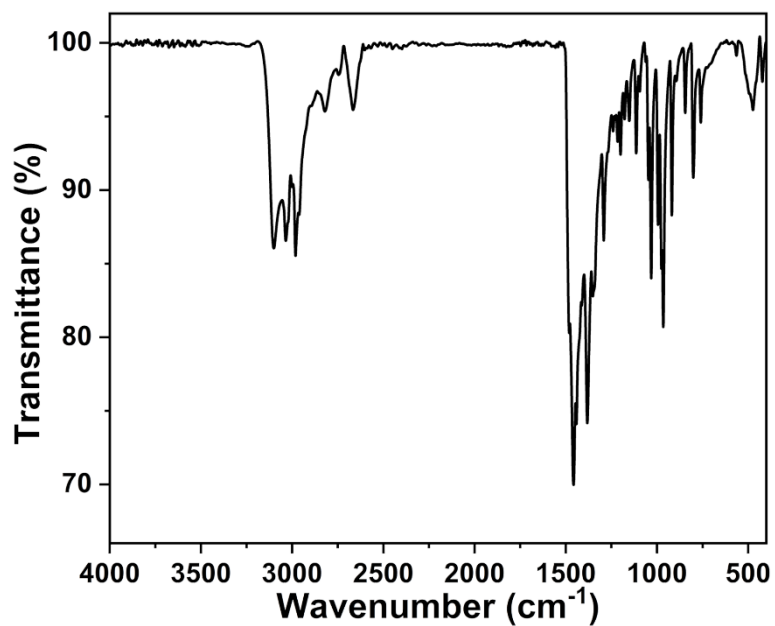

Fig. S8 The IR spectrum of compound 2.

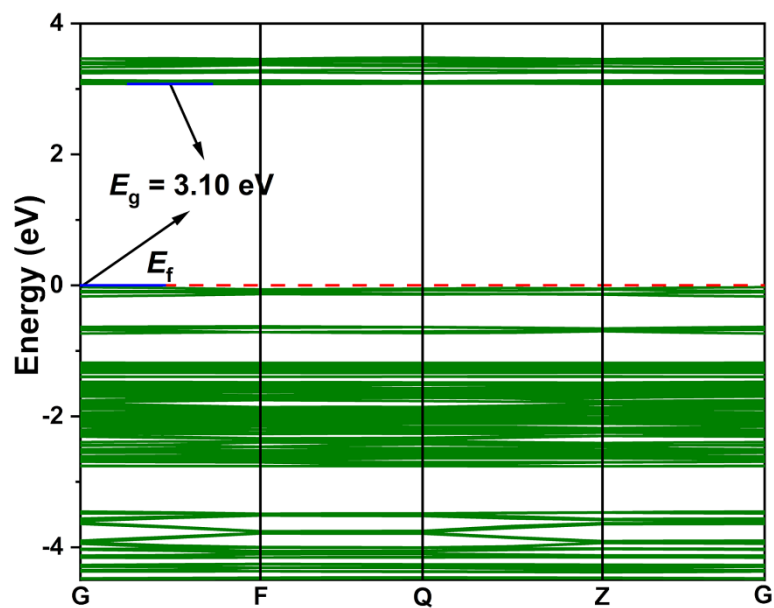

**Fig. S9** Calculated band structure of compound **1** (the Fermi level is set at 0 eV).

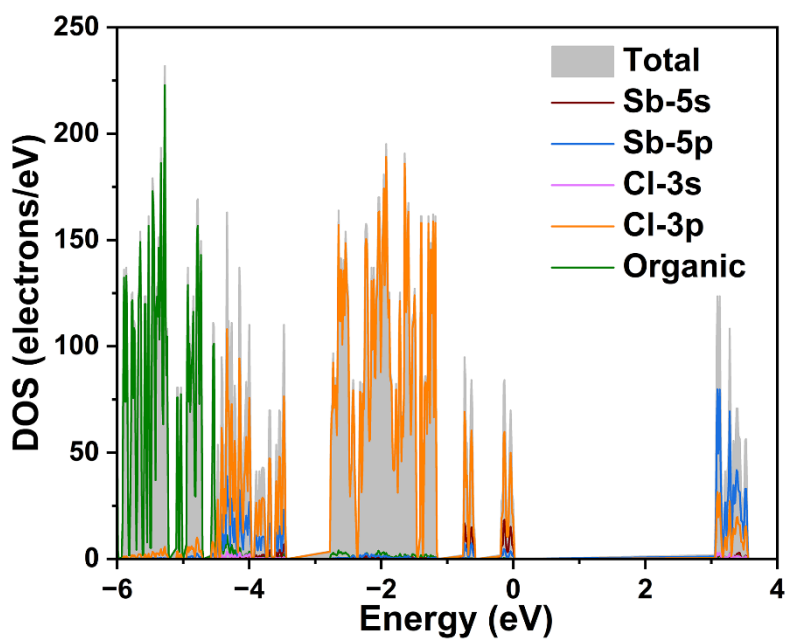

**Fig. S10** Total and partial DOSs for compound **1**.

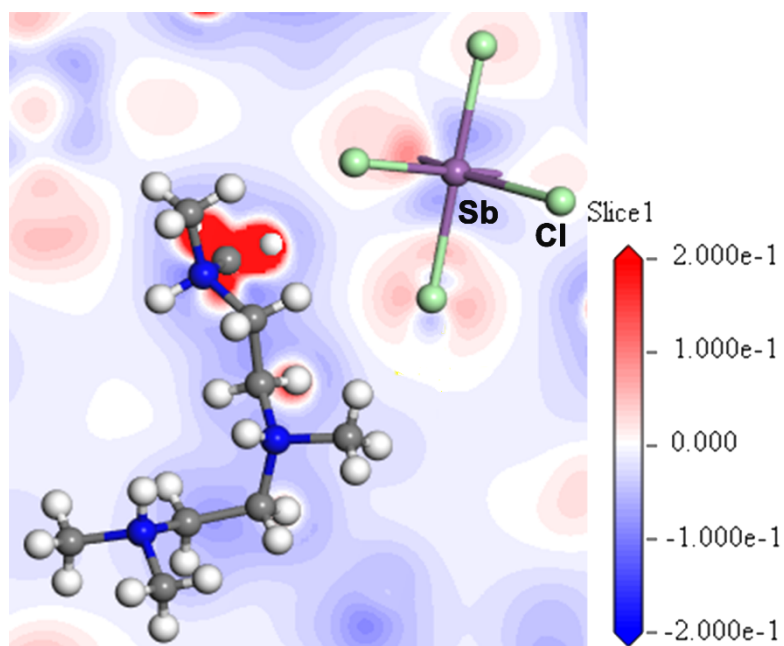

**Fig. S11** Electron-density difference map of compound 2.

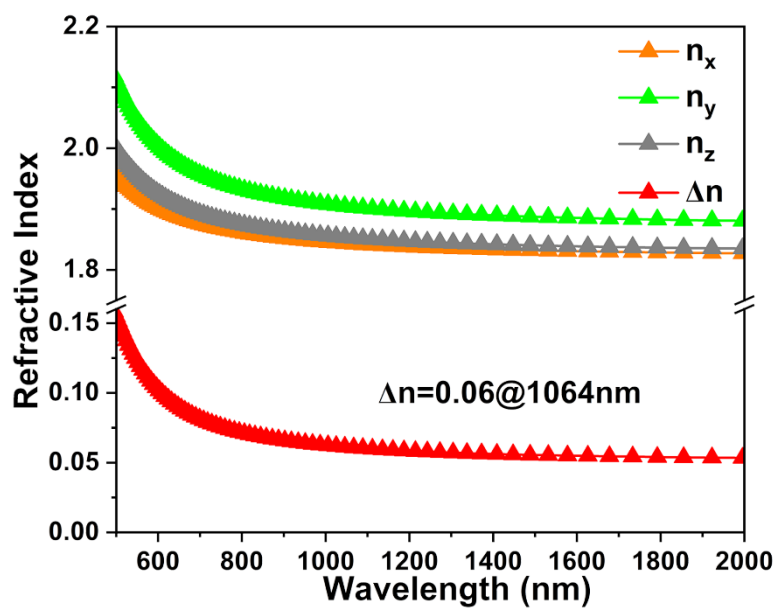

**Fig. S12** Calculated dispersion of refractive index curves and birefringence of compound 1.
